# Supplementary material for: Identification of multiple functional receptors for tyramine on an insect secretory epithelium
Source: PubMed Central journal article supplement (PMC5427925; doi:10.1038/s41598-017-00120-z), 2017-03-13
Supplement: 41598_2017_120_MOESM1_ESM.pdf [file 41598_2017_120_MOESM1_ESM.pdf]

Identification of multiple functional receptors for tyramine on an insect secretory epithelium

Haiying Zhang and Edward M. Blumenthal\*

Supplemental Data

Table S1: PCR primers

| Primer pair | left primer                | right primer                   |
|-------------|----------------------------|--------------------------------|
| A           | AAGATCGTGAAGAAGCGCACCAA    | CTGTTGTCGATACCCTTGGGCTT        |
| B           | GTCTTTGCCACCTTCATCGT       | TCCAGGGAGATCCAAATGTC           |
| C           | GATCATGATGAGGGCCAATC       | CAGTGACACTTACCGCATTGACAAGCACGC |
| D           | TAAAAAACCTCCCACACCTCCC     | GAGCTCGTTGTTGGTTGGCA           |
| E           | GCATCGTCGGGCTGGCATAT       | CAATCATATCGCTGTCTCACTCA        |
| F           | CAATCATATCGCTGTCTCACTCA    | GAACAAAAGCGCCATTTGCG           |
| G           | CCATGGGCTCCTTCTTCATA       | GGTCGTGTGAGTTCGTAGCA           |
| H           | GCAAAATATCTTGTGAGTGGTGTGCG | GTGCTGGTTAATTTGGGCGC           |
| I           | TGACATTCATCCGGGGTCAG       | AAAATCTGATACGCAGCACG           |
| J           | TTTTGGCCTGGCCAGAAAGC       | CGGACGTGGAGAATGAGCTG           |
| K           | TGGACATCCTGCTCTGCAGC       | CCATGGGCTCCTTCTTCATA           |

The table lists the sequences for PCR primers used in this study. A: *RpL32* quantitative PCR. B: *TAR2* quantitative PCR. Note that the amplicon produced from this primer pair does not overlap with the ds-RNA produced from the *TAR2*<sup>JF01878</sup> RNAi transgene. C: confirming the *TAR2*<sup>f05682</sup> insertion. D: identifying the *TAR2*<sup>JF01878</sup> and *TAR3*<sup>JF02749</sup> transgenes in potential recombinants. E: identifying the *c42-gal4*

transgene in potential recombinants. F: identifying the *c710-gal4* transgene in potential recombinants.  
G and H: screening potential deletion lines for deletion of *TAR2* and *TAR3*, respectively. I, J, and K:  
confirmation of *TAR3*<sup>Δ29</sup>, *Df(3R)TARΔ30*, and *Df(3R)TARΔ124* deletions, respectively.

Supplementary Figure S1

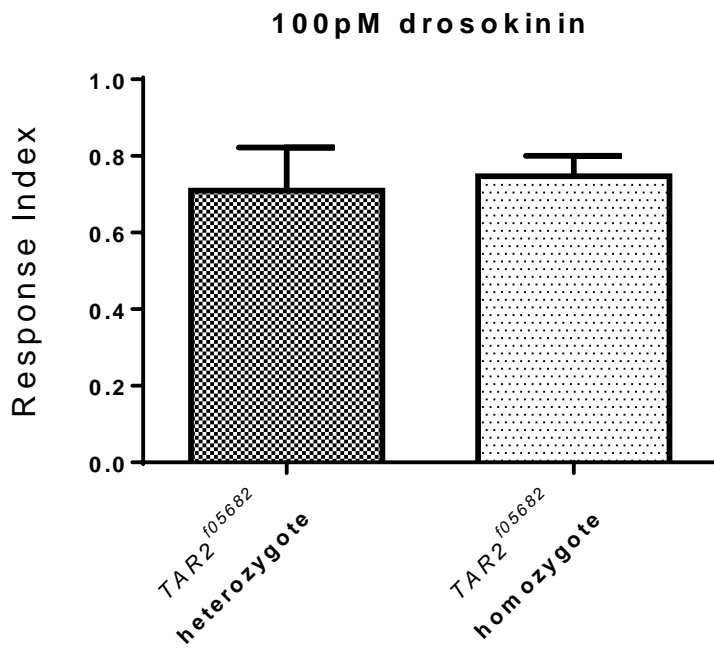

Figure S1. Mutation of TAR2 does not affect responses to drosokinin. Mean responses of tubules from *TAR2<sup>f05682</sup>* heterozygotes and homozygotes to 100 pM drosokinin are shown. There was no difference between the two genotypes,  $p=0.45$  Mann-Whitney test,  $n=6-7$  tubules per genotype.

## Supplementary Figure S2

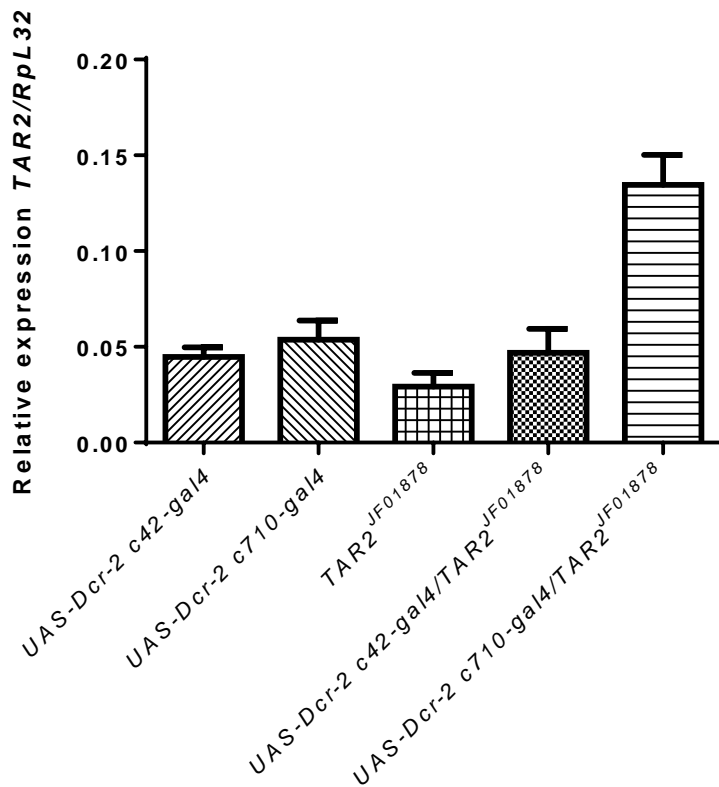

Figure S2. Inducing RNAi against TAR2 in either the principal or stellate cells does not result in a reduction in transcript abundance in the MT as a whole. Normalized TAR2 expression levels are shown for the three parental lines (first three bars), principal cell RNAi (fourth bar), and stellate cell RNAi (fifth bar). A Kruskal-Wallis and Dunn's multiple comparisons test showed a significant difference only between the RNAi parental line and stellate cell knockdown. N=3 independent cDNA preps per genotype.

Supplementary Figure S3

A

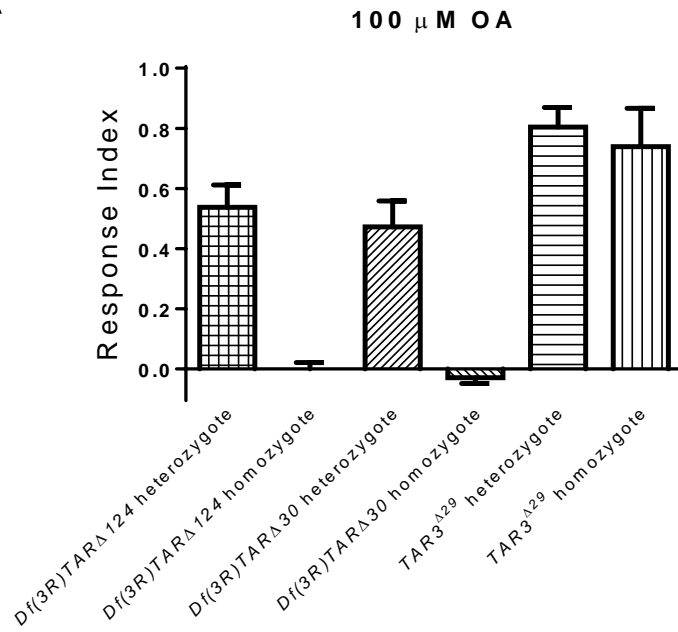

B

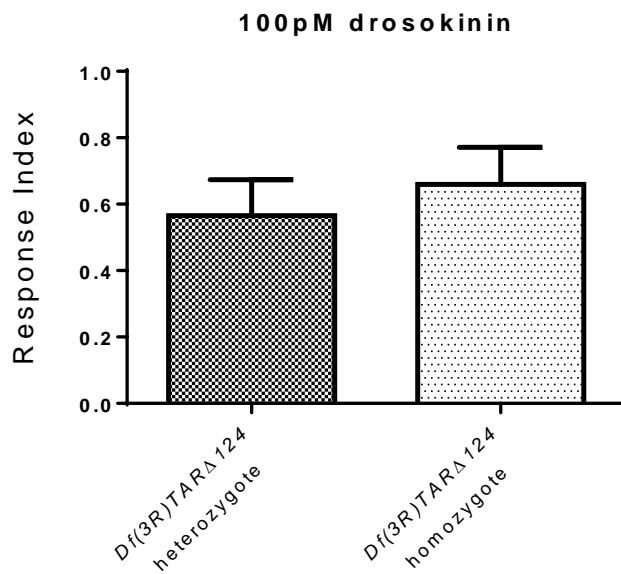

Figure S3. A: responses of deficiency mutations to 100 $\mu$ M OA. N=5-8 tubules per genotype. There was no difference in response amplitude between TAR3 <sup>$\Delta$ 29</sup> heterozygotes and homozygotes, p=0.22,

unpaired t-test. Average response amplitude in *Df(3R)TAR $\Delta$ 124* homozygotes did not differ from zero,  $p=0.97$ , one-sample t-test, while the average response of *Df(3R)TAR $\Delta$ 130* homozygotes was significantly less than zero,  $p=0.0002$ . B: responses of *Df(3R)TAR $\Delta$ 124* heterozygotes and homozygotes to 100pM drosokinin.  $N=9-10$  tubules per genotype. No difference was seen between the genotypes,  $p=0.07$  Mann-Whitney test (a non-parametric test was used because the homozygote dataset was not normally distributed).
